# Supplementary material for: Priming with Small Molecule-Based Biostimulants to Improve Abiotic Stress Tolerance in Arabidopsis thaliana
Source: MDPI journal article supplement (doi:10.3390/plants11101287), 2022-05-11
Supplement: s1 [file s1]

**Supplementary Table S1.** Phenotyping traits in Arabidopsis seedlings from primed seeds with Put, Orn or DAP at two concentrations (1 or 0.1 mM) under different growth conditions. Area under the growth curve (AUC), early seedling establishment (ESE), the slope of the growth curve (Slope), relative growth ratio (RGR), final growth (FG), and color index (GLI).

| Trait                       | Priming | Optimal             |    | Osmotic stress      |    | Salt stress         |    |
|-----------------------------|---------|---------------------|----|---------------------|----|---------------------|----|
|                             |         | Mean $\pm$ s.e.     | n  | Mean $\pm$ s.e.     | n  | Mean $\pm$ s.e.     | n  |
| AUC                         | Non     | 4800.7 $\pm$ 204.81 | 48 | 2213.3 $\pm$ 150.4  | 48 | 2013.4 $\pm$ 73.66  | 48 |
|                             | DAP 0.1 | 5059.1 $\pm$ 200.56 | 48 | 2052.7 $\pm$ 91.27  | 48 | 2147.1 $\pm$ 102.54 | 48 |
|                             | DAP 1   | 4920.9 $\pm$ 268.08 | 48 | 2438.4 $\pm$ 162.34 | 48 | 3062.7 $\pm$ 126.33 | 48 |
|                             | Orn 0.1 | 4550.9 $\pm$ 232.6  | 48 | 2322.8 $\pm$ 127.7  | 48 | 2508.6 $\pm$ 104.96 | 48 |
|                             | Orn 1   | 3285 $\pm$ 164.5    | 48 | 1710.1 $\pm$ 87.95  | 48 | 1708.1 $\pm$ 93.9   | 48 |
|                             | Put 0.1 | 4595.6 $\pm$ 222.78 | 48 | 2184.1 $\pm$ 115.08 | 48 | 2606.4 $\pm$ 111.53 | 48 |
|                             | Put 1   | 4420.9 $\pm$ 210.87 | 48 | 2264.4 $\pm$ 140.09 | 48 | 2291.5 $\pm$ 86.41  | 48 |
| ESE                         | Non     | 276.57 $\pm$ 10.9   | 46 | 211.41 $\pm$ 11.57  | 44 | 203.46 $\pm$ 8.31   | 48 |
|                             | DAP 0.1 | 279.35 $\pm$ 12.92  | 46 | 211.91 $\pm$ 9.08   | 45 | 237.57 $\pm$ 9.59   | 46 |
|                             | DAP 1   | 320.77 $\pm$ 14.34  | 48 | 231.02 $\pm$ 9.81   | 45 | 264.15 $\pm$ 12.38  | 47 |
|                             | Orn 0.1 | 274.63 $\pm$ 11.66  | 48 | 213.35 $\pm$ 9.27   | 43 | 259.02 $\pm$ 11.66  | 46 |
|                             | Orn 1   | 189.65 $\pm$ 8.7    | 43 | 173.98 $\pm$ 7.21   | 40 | 193.23 $\pm$ 9      | 43 |
|                             | Put 0.1 | 282.98 $\pm$ 10.2   | 45 | 182.3 $\pm$ 7.94    | 46 | 259.98 $\pm$ 11.43  | 48 |
|                             | Put 1   | 267.7 $\pm$ 13.65   | 46 | 217.96 $\pm$ 9.39   | 45 | 242.28 $\pm$ 8.85   | 46 |
| Slope (x 10 <sup>-3</sup> ) | Non     | 17.13 $\pm$ 0.42    | 47 | 10.26 $\pm$ 0.57    | 47 | 7.77 $\pm$ 0.43     | 46 |
|                             | DAP 0.1 | 17.26 $\pm$ 0.37    | 48 | 9.29 $\pm$ 0.48     | 47 | 7.65 $\pm$ 0.37     | 48 |
|                             | DAP 1   | 15.42 $\pm$ 0.39    | 47 | 11.05 $\pm$ 0.49    | 46 | 10.82 $\pm$ 0.44    | 48 |
|                             | Orn 0.1 | 15.31 $\pm$ 0.62    | 48 | 11.36 $\pm$ 0.46    | 47 | 7.94 $\pm$ 0.36     | 48 |
|                             | Orn 1   | 16.14 $\pm$ 0.65    | 48 | 10.32 $\pm$ 0.5     | 47 | 7.81 $\pm$ 0.39     | 46 |
|                             | Put 0.1 | 16.01 $\pm$ 0.51    | 47 | 12.46 $\pm$ 0.47    | 47 | 8.45 $\pm$ 0.45     | 48 |
|                             | Put 1   | 16.64 $\pm$ 0.57    | 47 | 10.3 $\pm$ 0.5      | 47 | 7.9 $\pm$ 0.35      | 47 |
| RGR                         | Non     | 0.413 $\pm$ 0.008   | 46 | 0.247 $\pm$ 0.014   | 43 | 0.214 $\pm$ 0.011   | 46 |
|                             | DAP 0.1 | 0.42 $\pm$ 0.009    | 46 | 0.228 $\pm$ 0.011   | 42 | 0.2 $\pm$ 0.01      | 45 |
|                             | DAP 1   | 0.374 $\pm$ 0.011   | 47 | 0.273 $\pm$ 0.013   | 42 | 0.277 $\pm$ 0.011   | 47 |
|                             | Orn 0.1 | 0.373 $\pm$ 0.016   | 48 | 0.284 $\pm$ 0.011   | 43 | 0.214 $\pm$ 0.009   | 46 |
|                             | Orn 1   | 0.409 $\pm$ 0.013   | 43 | 0.256 $\pm$ 0.013   | 39 | 0.193 $\pm$ 0.011   | 43 |
|                             | Put 0.1 | 0.383 $\pm$ 0.015   | 45 | 0.306 $\pm$ 0.01    | 46 | 0.228 $\pm$ 0.011   | 48 |
|                             | Put 1   | 0.398 $\pm$ 0.013   | 45 | 0.254 $\pm$ 0.012   | 45 | 0.215 $\pm$ 0.009   | 44 |
| FG                          | Non     | 3297.3 $\pm$ 149.9  | 48 | 963.2 $\pm$ 67.9    | 48 | 706.9 $\pm$ 32.5    | 48 |
|                             | DAP 0.1 | 3314.9 $\pm$ 150.9  | 48 | 822.3 $\pm$ 44.8    | 48 | 815.7 $\pm$ 53.4    | 48 |
|                             | DAP 1   | 3013.9 $\pm$ 161.4  | 48 | 1122.7 $\pm$ 69.4   | 48 | 1290 $\pm$ 80.2     | 48 |
|                             | Orn 0.1 | 2922 $\pm$ 181.5    | 48 | 1075.6 $\pm$ 62.6   | 48 | 863.8 $\pm$ 44.2    | 48 |
|                             | Orn 1   | 2215.1 $\pm$ 130.3  | 48 | 793.8 $\pm$ 42.9    | 48 | 636.1 $\pm$ 39.2    | 48 |
|                             | Put 0.1 | 3002.9 $\pm$ 165.9  | 48 | 1103.4 $\pm$ 56     | 48 | 1051.5 $\pm$ 66.4   | 48 |
|                             | Put 1   | 2849 $\pm$ 156.4    | 48 | 996 $\pm$ 66.1      | 48 | 848.1 $\pm$ 49.2    | 48 |
| GLI (x 10 <sup>-2</sup> )   | Non     | 12.5 $\pm$ 0.18     | 48 | 9 $\pm$ 0.38        | 48 | 6.4 $\pm$ 0.33      | 48 |
|                             | DAP 0.1 | 12.8 $\pm$ 0.18     | 48 | 7.8 $\pm$ 0.23      | 46 | 7.1 $\pm$ 0.26      | 48 |
|                             | DAP 1   | 12.6 $\pm$ 0.31     | 48 | 9 $\pm$ 0.34        | 47 | 8.6 $\pm$ 0.32      | 47 |
|                             | Orn 0.1 | 11.7 $\pm$ 0.41     | 48 | 10.1 $\pm$ 0.26     | 47 | 7.9 $\pm$ 0.28      | 48 |
|                             | Orn 1   | 11.5 $\pm$ 0.32     | 47 | 8.4 $\pm$ 0.3       | 48 | 6.7 $\pm$ 0.31      | 48 |
|                             | Put 0.1 | 12 $\pm$ 0.28       | 48 | 9.7 $\pm$ 0.26      | 48 | 8.2 $\pm$ 0.28      | 48 |
|                             | Put 1   | 11.7 $\pm$ 0.33     | 48 | 9 $\pm$ 0.28        | 47 | 7.9 $\pm$ 0.34      | 48 |

**Supplementary Table S2.** Content of free amino acid (pmol mg<sup>-1</sup> DW, except AcPut in fmol mg<sup>-1</sup> DW) in Arabidopsis seedlings from primed seeds with Put, Orn or DAP at two concentrations 1 or 0.1 mM under different growth conditions. Mean ± s.e. N= 4.

|                    | Priming | Tyra        | Leu         | Ile         | Phe         | AcPut       | GABA           | Trp          | BABA        | Met         | Val           | Pro              | B-Ala         | Tyr          | Ala             | Thr            | AcOrn          | AAA         | Gly            | Asp              | Glu            | Ser               | Asn            | Gln              | Cit            | Arg            | His         | Orn            | Cis         |
|--------------------|---------|-------------|-------------|-------------|-------------|-------------|----------------|--------------|-------------|-------------|---------------|------------------|---------------|--------------|-----------------|----------------|----------------|-------------|----------------|------------------|----------------|-------------------|----------------|------------------|----------------|----------------|-------------|----------------|-------------|
| Optimal conditions | Non     | 0.02 ± 0.01 | 0.52 ± 0.10 | 0.47 ± 0.18 | 0.45 ± 0.07 | 0.17 ± 0.02 | 38.51 ± 7.14   | 0.35 ± 0.11  | 1.73 ± 0.86 | 0.34 ± 0.11 | 29.08 ± 8.02  | 335.47 ± 46.98   | 23.73 ± 4.75  | 3.41 ± 0.56  | 256.19 ± 25.77  | 128.01 ± 22.11 | 1.94 ± 1.06    | 1.78 ± 0.48 | 210.23 ± 21.27 | 1107.06 ± 302.13 | 3.5 ± 0.96     | 209.3 ± 36.7      | 33.91 ± 11.7   | 541.61 ± 191.42  | 118.25 ± 16.88 | 64.89 ± 6.96   | 4.62 ± 1.56 | 16.01 ± 1.62   | 0.48 ± 0.28 |
|                    | DAP 0.1 | 0.05 ± 0.02 | 1.77 ± 0.39 | 1.00 ± 0.30 | 2.16 ± 1.70 | 0.89 ± 0.34 | 52.75 ± 18.08  | 2.48 ± 0.94  | 9.72 ± 5.02 | 3.89 ± 1.74 | 29.98 ± 14.47 | 1796.39 ± 407.75 | 31.84 ± 8.5   | 8.45 ± 4.96  | 244.08 ± 81.63  | 61.6 ± 8.92    | 42.03 ± 9.21   | 1.61 ± 1.06 | 128.63 ± 29.47 | 866.18 ± 794.44  | 23.04 ± 15.86  | 791.47 ± 298.34   | 126.24 ± 55.98 | 2853.51 ± 816.11 | 79.13 ± 20.51  | 226.68 ± 75.54 | 7.28 ± 1.91 | 13.39 ± 2.38   | 0.63 ± 0.22 |
|                    | DAP 1   | 0.08 ± 0.02 | 2.1 ± 0.59  | 1.45 ± 0.21 | 1.54 ± 0.32 | 0.85 ± 0.29 | 103.08 ± 20.55 | 1.5 ± 0.19   | 27.5 ± 7.59 | 6.87 ± 1.53 | 46.95 ± 9.12  | 665.64 ± 114.05  | 28.19 ± 3.36  | 6.23 ± 1.06  | 367.69 ± 51.3   | 196.58 ± 19.06 | 28.41 ± 5.93   | 1.54 ± 0.56 | 231.61 ± 43.92 | 1141.6 ± 402.79  | 7.03 ± 1.39    | 278.31 ± 44.88    | 51.83 ± 10.85  | 1241.23 ± 307.31 | 149.62 ± 26.86 | 124.34 ± 21.52 | 13.07 ± 2.7 | 16.05 ± 2.21   | 0.06 ± 0.02 |
|                    | Orn 0.1 | 0.05 ± 0.01 | 1.63 ± 0.43 | 1.08 ± 0.40 | 1.34 ± 0.27 | 0.77 ± 0.22 | 49.25 ± 11.85  | 1.64 ± 0.26  | 6.87 ± 2.29 | 9.75 ± 2.05 | 52.49 ± 10.24 | 737.51 ± 134.09  | 29.42 ± 5.45  | 6.28 ± 1.27  | 422.86 ± 86.22  | 175.75 ± 24.04 | 21.9 ± 3.51    | 1.28 ± 0.11 | 274.04 ± 63.01 | 1606.29 ± 214.43 | 1.77 ± 0.2     | 159.69 ± 42.59    | 22.82 ± 6.71   | 1045.09 ± 246.13 | 101.71 ± 15.04 | 102.27 ± 17.06 | 9.83 ± 2.03 | 10.51 ± 1.76   | 0.04 ± 0.01 |
|                    | Orn 1   | 0.03 ± 0.00 | 1.51 ± 0.18 | 1.08 ± 0.09 | 1.29 ± 0.13 | 2.23 ± 0.64 | 58.56 ± 12.27  | 0.99 ± 0.12  | 4.58 ± 0.19 | 2.51 ± 0.18 | 30.47 ± 1.33  | 694.96 ± 173.07  | 28.6 ± 3.41   | 5.46 ± 0.95  | 246.97 ± 21.57  | 89.37 ± 6.56   | 34.61 ± 7.59   | 0.71 ± 0.08 | 157.52 ± 24.39 | 384.38 ± 69.62   | 15.35 ± 1.96   | 586.32 ± 53.59    | 91.1 ± 12.52   | 1707.1 ± 370.68  | 97 ± 9.15      | 147.5 ± 22.73  | 4.19 ± 1.58 | 8.92 ± 2.07    | 0.05 ± 0.02 |
|                    | Put 0.1 | 0.06 ± 0.01 | 1.02 ± 0.40 | 0.85 ± 0.32 | 1.12 ± 0.23 | 0.84 ± 0.31 | 23.47 ± 7.96   | 1.08 ± 0.55  | 7.78 ± 2.13 | 3.21 ± 0.83 | 40.35 ± 14.69 | 600.83 ± 72.76   | 23.03 ± 4.58  | 5.1 ± 0.94   | 286.33 ± 65.94  | 138.73 ± 30.93 | 23.51 ± 11.35  | 0.93 ± 0.3  | 237.28 ± 32.59 | 332.07 ± 109.69  | 2.67 ± 1.07    | 169.65 ± 49.05    | 23.53 ± 8.47   | 1166.7 ± 281.17  | 97.79 ± 25.65  | 104.95 ± 24.29 | 6 ± 1.19    | 10.71 ± 3.23   | 0.02 ± 0.00 |
|                    | Put 1   | 0.02 ± 0.00 | 1.36 ± 0.37 | 1.07 ± 0.30 | 0.74 ± 0.14 | 0.17 ± 0.03 | 12.68 ± 2.31   | 0.39 ± 0.39  | 5.74 ± 1.78 | 1.6 ± 0.64  | 45.24 ± 11.67 | 385.68 ± 65.84   | 6.19 ± 1.26   | 3.74 ± 0.95  | 101.75 ± 25.55  | 152.83 ± 46.91 | 7.32 ± 1.72    | 1.07 ± 0.39 | 87.78 ± 15     | 513.81 ± 159.4   | 42.3 ± 8.55    | 518.03 ± 70.85    | 153.48 ± 38.85 | 846.69 ± 171.8   | 40.7 ± 9.64    | 96.4 ± 19.5    | 7.17 ± 1.15 | 7.44 ± 2.09    | 0.02 ± 0.01 |
| Osmotic stress     | Non     | 0.02 ± 0.01 | 1.68 ± 0.59 | 1.46 ± 0.28 | 1.9 ± 0.27  | 0.57 ± 0.25 | 28.58 ± 7.58   | 1.56 ± 0.35  | 4.24 ± 1.2  | 4.58 ± 1.7  | 41.87 ± 11.34 | 492.89 ± 109.53  | 9.32 ± 3.41   | 4.59 ± 1.01  | 136.43 ± 24.76  | 150.63 ± 26.58 | 9.06 ± 2.4     | 0.88 ± 0.22 | 147.28 ± 18.46 | 344.46 ± 78.17   | 147.78 ± 30.2  | 823.69 ± 291.65   | 279.96 ± 112.1 | 937.65 ± 169.26  | 47.29 ± 10.77  | 106.12 ± 29.69 | 4.8 ± 1.06  | 9.49 ± 1.8     | 0.28 ± 0.06 |
|                    | DAP 0.1 | 0.03 ± 0.01 | 1.41 ± 0.40 | 1.17 ± 0.33 | 0.77 ± 0.19 | 0.27 ± 0.09 | 32.83 ± 11.41  | 1.63 ± 0.96  | 6.75 ± 1.38 | 1.1 ± 0.61  | 36.44 ± 5.55  | 415.46 ± 108.6   | 10.55 ± 1.95  | 4.6 ± 0.54   | 111.74 ± 22.44  | 114.07 ± 30.71 | 5.25 ± 2.17    | 0.99 ± 0.22 | 86.73 ± 17.91  | 50.47 ± 8.63     | 47.66 ± 8.06   | 453.33 ± 48.95    | 138.58 ± 20.19 | 1294.55 ± 214.18 | 21.09 ± 2.21   | 61.58 ± 13.76  | 5.72 ± 0.79 | 3.87 ± 0.71    | 0.32 ± 0.08 |
|                    | DAP 1   | 0.04 ± 0.01 | 1.38 ± 0.32 | 0.97 ± 0.15 | 1.12 ± 0.26 | 0.68 ± 0.10 | 52.58 ± 9.39   | 1.59 ± 0.25  | 3.26 ± 0.44 | 1.92 ± 0.32 | 20.25 ± 3.02  | 683.27 ± 127.72  | 11.11 ± 1.91  | 4.71 ± 0.7   | 127.95 ± 29.51  | 107.25 ± 25.46 | 2.69 ± 0.84    | 0.41 ± 0.08 | 69.47 ± 19.13  | 245.47 ± 66.03   | 38.11 ± 13.91  | 510.07 ± 93.69    | 113.45 ± 34.73 | 1506.48 ± 296.14 | 19.14 ± 4.15   | 64.51 ± 9.5    | 7.47 ± 1.22 | 3.19 ± 0.73    | 0.04 ± 0.01 |
|                    | Orn 0.1 | 0.06 ± 0.00 | 1.74 ± 0.13 | 1.42 ± 0.10 | 1.53 ± 0.14 | 0.74 ± 0.05 | 39.86 ± 13.77  | 1.83 ± 0.26  | 5.32 ± 1.03 | 1.23 ± 0.16 | 24.26 ± 1.43  | 949.14 ± 147.16  | 12.03 ± 1.12  | 6.21 ± 0.2   | 153.91 ± 25.9   | 157.51 ± 25.71 | 5.21 ± 1.02    | 0.55 ± 0.1  | 97.02 ± 19.94  | 335.65 ± 63.72   | 34.85 ± 10.55  | 549.23 ± 129.47   | 72.01 ± 19.83  | 2142.54 ± 227.59 | 27.45 ± 3.3    | 128.6 ± 27.21  | 7.09 ± 1.59 | 6.1 ± 1.13     | 0.08 ± 0.02 |
|                    | Orn 1   | 0.05 ± 0.02 | 0.66 ± 0.28 | 0.46 ± 0.17 | 0.79 ± 0.27 | 0.19 ± 0.10 | 7.13 ± 2.41    | 1.07 ± 0.43  | 7.76 ± 3.18 | 0.87 ± 0.36 | 16.82 ± 3.49  | 343.42 ± 117.81  | 3.34 ± 1.14   | 2.17 ± 0.98  | 68.3 ± 3.56     | 59.87 ± 20.41  | 1.38 ± 0.34    | 0.66 ± 0.27 | 51.8 ± 16.51   | 37.08 ± 9.3      | 300.73 ± 35.21 | 1777.41 ± 128.78  | 184.36 ± 44.51 | 1411.57 ± 364.67 | 28.41 ± 10.4   | 112.63 ± 43.65 | 2.16 ± 0.37 | 3.69 ± 1.35    | 0.03 ± 0.02 |
|                    | Put 0.1 | 0.08 ± 0.02 | 4.92 ± 1.18 | 2.86 ± 0.19 | 2.71 ± 0.59 | 0.07 ± 0.04 | 115.06 ± 23.69 | 0.04 ± 0.00  | 11.3 ± 1.43 | 4.37 ± 1.7  | 60.8 ± 4.6    | 3138.18 ± 497.01 | 39.69 ± 5.89  | 15.71 ± 3.08 | 501.66 ± 50.08  | 281.59 ± 36.3  | 15.18 ± 2.15   | 1.08 ± 0.25 | 97.91 ± 16.19  | 500.65 ± 33      | 22.3 ± 3.89    | 1864.69 ± 147.17  | 24.21 ± 4.61   | 1150.52 ± 247.25 | 113.2 ± 6.52   | 140.25 ± 18.84 | 3.91 ± 1.08 | 37.75 ± 11.1   | 0.01 ± 0.00 |
|                    | Put 1   | 0.06 ± 0.02 | 1.07 ± 0.26 | 0.85 ± 0.20 | 1.01 ± 0.30 | 0.57 ± 0.15 | 27.9 ± 5.48    | 0.002 ± 0.00 | 8.72 ± 1.51 | 0.96 ± 0.31 | 24.77 ± 4.27  | 581.74 ± 154.12  | 7.56 ± 1.65   | 3.76 ± 0.78  | 133.91 ± 31.51  | 135.43 ± 34.52 | 3.41 ± 0.71    | 0.47 ± 0.13 | 121.04 ± 29.52 | 246.4 ± 68.11    | 20.6 ± 1.94    | 138.75 ± 29.32    | 34.82 ± 7.9    | 652.26 ± 161.81  | 18.97 ± 4.43   | 51.06 ± 13.26  | 4.5 ± 1.51  | 4.14 ± 1.27    | 0.01 ± 0.01 |
| Salt stress        | Non     | 0.04 ± 0.02 | 2.33 ± 1.16 | 1.28 ± 0.64 | 1.53 ± 0.77 | 1.77 ± 0.89 | 125.97 ± 62.99 | 4.3 ± 2.15   | 3.62 ± 1.81 | 1.93 ± 0.97 | 48.25 ± 24.13 | 1529.89 ± 764.95 | 23.94 ± 11.97 | 5.18 ± 2.59  | 307.14 ± 153.57 | 158.88 ± 79.44 | 7.16 ± 3.58    | 1.57 ± 0.79 | 164.69 ± 82.34 | 345.62 ± 172.81  | 45.76 ± 22.88  | 1811.59 ± 905.8   | 79.35 ± 39.68  | 920.07 ± 460.03  | 158.12 ± 79.06 | 123.64 ± 61.82 | 8.55 ± 4.27 | 31.18 ± 15.59  | 0.24 ± 0.12 |
|                    | DAP 0.1 | 0.06 ± 0.03 | 1.98 ± 0.54 | 1.01 ± 0.32 | 1.39 ± 0.28 | 0.14 ± 0.03 | 44.48 ± 14.25  | 0.71 ± 0.29  | 4.26 ± 0.6  | 1.11 ± 0.35 | 24.35 ± 2.95  | 1683.7 ± 331.45  | 21.38 ± 4.32  | 4.12 ± 1.73  | 205.98 ± 42.62  | 231.2 ± 46.18  | 137.27 ± 26.28 | 1.03 ± 0.13 | 48.49 ± 16.61  | 128.46 ± 27.65   | 30.62 ± 7.92   | 1923.89 ± 586.38  | 31.19 ± 9.26   | 759.98 ± 199.61  | 98.15 ± 26.35  | 96.65 ± 21.62  | 3.77 ± 0.76 | 32.58 ± 6.83   | 0.14 ± 0.06 |
|                    | DAP 1   | 0.03 ± 0.02 | 1.74 ± 0.43 | 0.69 ± 0.17 | 0.99 ± 0.16 | 0.76 ± 0.45 | 51.58 ± 14.98  | 1.05 ± 0.37  | 4.44 ± 0.77 | 3.19 ± 1.29 | 22.56 ± 4.4   | 1471.65 ± 227.68 | 22.93 ± 5.96  | 6.71 ± 1.17  | 232.15 ± 93.67  | 209.46 ± 54.6  | 115.13 ± 15.74 | 0.88 ± 0.27 | 38.29 ± 9      | 159.02 ± 57.27   | 43.82 ± 12.05  | 3223.58 ± 837.29  | 33.72 ± 5.37   | 394.03 ± 56.35   | 50.86 ± 10.37  | 51.92 ± 10.37  | 5.21 ± 1.05 | 7.68 ± 2.48    | 0.03 ± 0.01 |
|                    | Orn 0.1 | 0.02 ± 0.00 | 1.71 ± 0.25 | 1.01 ± 0.15 | 1.43 ± 0.15 | 0.11 ± 0.06 | 48.85 ± 14.97  | 0.92 ± 0.16  | 5.51 ± 1.86 | 1.77 ± 0.69 | 68.15 ± 19.38 | 1834.87 ± 179.32 | 30.86 ± 4.43  | 7.46 ± 1.77  | 530.22 ± 162.79 | 273.07 ± 65.51 | 200.31 ± 17.32 | 2.4 ± 1.01  | 120.92 ± 41.89 | 1060.16 ± 560.62 | 19.62 ± 2.89   | 1215.33 ± 133.98  | 46.98 ± 6.7    | 1215.46 ± 207.37 | 200.74 ± 21    | 132.05 ± 16.61 | 2.29 ± 0.46 | 23.86 ± 5.79   | 0.03 ± 0.01 |
|                    | Orn 1   | 0.02 ± 0.01 | 1.58 ± 0.58 | 1.18 ± 0.49 | 1.53 ± 0.61 | 0.04 ± 0.01 | 10.26 ± 3.27   | 0.84 ± 0.23  | 8.12 ± 1.79 | 2.05 ± 1.07 | 42.48 ± 12.35 | 419.19 ± 154.31  | 21.75 ± 5.21  | 3.23 ± 1.38  | 283.99 ± 63.57  | 258.83 ± 33.5  | 53.81 ± 9.44   | 2.76 ± 0.87 | 168.19 ± 8.33  | 442.55 ± 128.85  | 113.49 ± 41.84 | 4205.75 ± 1983.27 | 128.57 ± 54.69 | 642.81 ± 216.28  | 129.56 ± 33.02 | 107.43 ± 38.14 | 4.43 ± 1.47 | 35.02 ± 8.39   | 0.01 ± 0.00 |
|                    | Put 0.1 | 0.11 ± 0.03 | 1.90 ± 0.61 | 1.70 ± 0.37 | 1.62 ± 0.43 | 0.99 ± 0.16 | 42.49 ± 12.66  | 0.16 ± 0.15  | 9.73 ± 3.22 | 2.06 ± 0.69 | 36.92 ± 6.57  | 543.07 ± 140.56  | 11.12 ± 3.49  | 4.45 ± 1.01  | 138.85 ± 27.53  | 140.81 ± 32.53 | 3.27 ± 1.3     | 0.53 ± 0.13 | 104.33 ± 24.9  | 436.47 ± 118.38  | 15.94 ± 6.59   | 195.95 ± 76.91    | 113.92 ± 32.22 | 782.18 ± 186.59  | 19.89 ± 4.91   | 80.66 ± 34.69  | 6.88 ± 1.23 | 2.6 ± 0.63     | 0.04 ± 0.02 |
|                    | Put 1   | 0.03 ± 0.01 | 1.60 ± 0.50 | 0.86 ± 0.33 | 1.28 ± 0.24 | 0.46 ± 0.24 | 30.39 ± 8.59   | 0.02 ± 0.01  | 6.05 ± 2.6  | 0.63 ± 0.22 | 32.8 ± 4.44   | 2128.18 ± 160.54 | 26.77 ± 1.76  | 5.97 ± 1.98  | 382.28 ± 143.4  | 416.91 ± 68.38 | 132.17 ± 35.25 | 1.37 ± 0.47 | 288.09 ± 64.65 | 1571.26 ± 662.57 | 61.09 ± 49.69  | 1090.05 ± 221.02  | 26.74 ± 3.91   | 513.69 ± 148.09  | 165.41 ± 27.74 | 89.43 ± 28.71  | 1.61 ± 0.74 | 104.72 ± 16.66 | 0.02 ± 0.00 |

**Supplementary Table S3.** Content of total and free polyamines (pmol mg<sup>-1</sup> DW) in Arabidopsis seedlings from primed seeds with Put, Orn or DAP at two concentrations 1 or 0.1 mM under different growth conditions.

Mean ± s.e. N= 4

|                    |         | Total polyamines (conjugated +free) |                   |                 |               |                   |                    |                 |                |                   |                   |
|--------------------|---------|-------------------------------------|-------------------|-----------------|---------------|-------------------|--------------------|-----------------|----------------|-------------------|-------------------|
|                    |         | Hist                                | Put               | DAP             | Cad           | NorSpd            | Spd                | HomoSpd         | ThSpm          | Spm               | Agm               |
| Optimal conditions | Non     | <LOD                                | 1483.92 ± 622.92  | 47.46 ± 21.07   | 2.09 ± 0.77   | 82.66 ± 15.3      | 3947.72 ± 890.64   | 66.64 ± 31.02   | 11.56 ± 3.96   | 576.62 ± 43.46    | 784.72 ± 300.69   |
|                    | DAP 0.1 | <LOD                                | 2946.58 ± 646.06  | 130.97 ± 38.35  | 7.77 ± 8.07   | 122.64 ± 17.39    | 5391 ± 883.97      | 149.99 ± 29.3   | 18.59 ± 7.05   | 722.4 ± 179.1     | 1081.27 ± 219.61  |
|                    | DAP 1   | <LOD                                | 4381.49 ± 817.72  | 632.54 ± 155.01 | 17.18 ± 9.04  | 139.5 ± 30        | 7369.9 ± 2860.27   | 59.77 ± 19.7    | 47.38 ± 16.06  | 1510.39 ± 667.16  | 2497.56 ± 295.92  |
|                    | Orn 0.1 | <LOD                                | 3368.87 ± 537.14  | 85.87 ± 51.2    | 2.53 ± 0.31   | 238.21 ± 84.36    | 7015.61 ± 1094.65  | 61.01 ± 8.88    | 25.98 ± 11.93  | 1063.56 ± 251.19  | 2458.41 ± 299.05  |
|                    | Orn 1   | <LOD                                | 411.66 ± 238.5    | 49.69 ± 16.4    | 2.6 ± 1.09    | 169.54 ± 84.32    | 1665.05 ± 445.13   | 48.61 ± 27.34   | 4.83 ± 2.27    | 286.34 ± 32.87    | 1390.05 ± 351     |
|                    | Put 0.1 | <LOD                                | 2031.61 ± 457.04  | 163.81 ± 72.74  | 7.89 ± 3.42   | 2919.27 ± 1815.43 | 5045.13 ± 1901.83  | 71.6 ± 2.87     | 11.2 ± 4.4     | 540.04 ± 218.45   | 1969.78 ± 491.05  |
|                    | Put 1   | <LOD                                | 3569.84 ± 1289.46 | 81.75 ± 32.08   | 8.13 ± 4.61   | 132.97 ± 22.77    | 7516.11 ± 1973.98  | 61.73 ± 19.55   | 44.96 ± 9.04   | 2745.76 ± 2797.11 | 4692.94 ± 1106.08 |
| Osmotic stress     | Non     | <LOD                                | 530.01 ± 47.62    | 42.74 ± 3.98    | 6.1 ± 3.21    | 116.77 ± 29.36    | 3246.52 ± 716.23   | 56.8 ± 13.74    | 4.53 ± 1.52    | 1370.39 ± 426.49  | 1793.78 ± 843.04  |
|                    | DAP 0.1 | <LOD                                | 816.28 ± 179.21   | 140.18 ± 40.22  | 4.3 ± 1.57    | 1601.52 ± 365.81  | 3932.4 ± 1483.99   | 55.68 ± 17.65   | 23.36 ± 37.43  | 1526.91 ± 621.67  | 2289.2 ± 253.86   |
|                    | DAP 1   | <LOD                                | 1407.17 ± 348.21  | 398.14 ± 124.17 | 15.35 ± 8.18  | 208.31 ± 105.31   | 6495.11 ± 794.54   | 88.36 ± 26.31   | 11.55 ± 8.92   | 2371.02 ± 366.85  | 5171.37 ± 1104.79 |
|                    | Orn 0.1 | <LOD                                | 793.1 ± 320.42    | 124.28 ± 57.88  | 3.58 ± 0.57   | 122.14 ± 43.03    | 4727.82 ± 1357.66  | 77.05 ± 31.11   | 1.97 ± 0.6     | 2359.03 ± 718.07  | 5614.52 ± 1000.09 |
|                    | Orn 1   | <LOD                                | 211.29 ± 84.81    | 61.8 ± 18.04    | 2.9 ± 1.25    | 722.04 ± 456.34   | 1544.01 ± 157.39   | 50.01 ± 12.15   | 1.86 ± 0.89    | 713.36 ± 183.38   | 2066.23 ± 307.06  |
|                    | Put 0.1 | <LOD                                | 437.53 ± 64.96    | 89.22 ± 61.95   | 15.8 ± 5.74   | 302.5 ± 99.33     | 2653.87 ± 381.59   | 68.6 ± 19.25    | 1.09 ± 0.91    | 805.63 ± 155.7    | 2387.28 ± 166.37  |
|                    | Put 1   | <LOD                                | 972.51 ± 214.69   | 123.71 ± 67.38  | 16.45 ± 10.79 | 3052.22 ± 1383.02 | 6410.4 ± 1551.01   | 114.66 ± 63.96  | 10.28 ± 6.85   | 4477.64 ± 1500.14 | 6906.04 ± 1041.27 |
| Salt stress        | Non     | <LOD                                | 1951.95 ± 644.61  | 46.04 ± 13.49   | 2.63 ± 0.71   | 131.12 ± 23.2     | 5517.65 ± 1019.01  | 72.18 ± 13.45   | 13.4 ± 12.89   | 111.32 ± 19.54    | 1875.17 ± 636.91  |
|                    | DAP 0.1 | <LOD                                | 3067.97 ± 481.52  | 106.33 ± 29.68  | 3.81 ± 1.95   | 168.65 ± 91.49    | 7591.67 ± 693.42   | 86.75 ± 21.81   | 86.49 ± 27.82  | 2841.42 ± 893.43  | 1508.86 ± 320.72  |
|                    | DAP 1   | <LOD                                | 5189.04 ± 698.35  | 686 ± 160.34    | 22.37 ± 9.09  | 91.36 ± 55.48     | 11413.65 ± 378.39  | 271.25 ± 16.66  | 174.09 ± 56.13 | 4481.67 ± 2698.49 | 3944.83 ± 1248.91 |
|                    | Orn 0.1 | <LOD                                | 6448.31 ± 559.55  | 106.53 ± 29.87  | 4.38 ± 1.4    | 103.92 ± 49.45    | 12705.21 ± 773.56  | 387.06 ± 242.56 | 240.04 ± 74.02 | 5750.77 ± 1613.32 | 3703.63 ± 1010.48 |
|                    | Orn 1   | <LOD                                | 2571.39 ± 816.32  | 61.46 ± 3.52    | 2.58 ± 0.14   | 198.86 ± 66.13    | 9219.48 ± 845.81   | 81.49 ± 20.53   | 62.94 ± 20.86  | 1967.53 ± 632.98  | 4055.97 ± 1829.44 |
|                    | Put 0.1 | <LOD                                | 5922.81 ± 918     | 61.95 ± 32.05   | 4.6 ± 3       | 1320.86 ± 130.35  | 12120.06 ± 2529.84 | 405.15 ± 210.17 | 210.03 ± 53.21 | 4871.3 ± 2506.62  | 4960.2 ± 1887.06  |
|                    | Put 1   | <LOD                                | 4474.26 ± 1000.92 | 82.4 ± 16.16    | 23.2 ± 13.83  | 245.65 ± 149.79   | 11657.04 ± 2615.12 | 120.37 ± 7.87   | 212.23 ± 35.09 | 6943.28 ± 994.38  | 7291.02 ± 2791.51 |
|                    |         | Free polyamines                     |                   |                 |               |                   |                    |                 |                |                   |                   |
|                    |         | Hist                                | Put               | DAP             | Cad           | NorSpd            | Spd                | HomoSpd         | ThSpm          | Spm               | Agm               |
| Optimal conditions | Non     | 39.91 ± 4.76                        | 4362.93 ± 5650.59 | 47.05 ± 23.47   | 18.46 ± 4.49  | 47.24 ± 33.84     | 819.34 ± 199.55    | 18.33 ± 8.43    | 2.47 ± 0.09    | 23.25 ± 5.37      | 1004.05 ± 384.27  |
|                    | DAP 0.1 | 29.22 ± 9.55                        | 1909.48 ± 399     | 54.39 ± 15.52   | 15.85 ± 1.1   | 11.67 ± 5.18      | 583.94 ± 272.47    | 20.4 ± 9.48     | 2.37 ± 0.23    | 15.96 ± 8.73      | 625.59 ± 246.49   |
|                    | DAP 1   | 20.61 ± 5.68                        | 3339.18 ± 345.48  | 349.56 ± 172.28 | 40.59 ± 10.56 | 13.58 ± 2.38      | 912.8 ± 484.78     | 8.64 ± 4.99     | 2.49 ± 0.22    | 20.57 ± 7.07      | 953.52 ± 236.03   |
|                    | Orn 0.1 | 16.56 ± 3.57                        | 2140.54 ± 438.05  | 23.77 ± 10.47   | 12.81 ± 3.46  | 28.28 ± 10.05     | 655.58 ± 189.46    | 9.01 ± 2.18     | 2.14 ± 0.14    | 14.78 ± 4.79      | 700.73 ± 221.24   |
|                    | Orn 1   | 14.88 ± 8.75                        | 471.21 ± 194.48   | 27.45 ± 20.12   | 5.57 ± 1.76   | 21.05 ± 18.74     | 264.65 ± 120.17    | 13.44 ± 8.86    | 2.07 ± 0.04    | 13.39 ± 8.5       | 443.43 ± 74.74    |
|                    | Put 0.1 | 6.81 ± 1.06                         | 1195.08 ± 478.17  | 91.13 ± 66.7    | 3.52 ± 1.08   | 141.85 ± 30.22    | 628.92 ± 308.97    | 11.81 ± 3.85    | 1.13 ± 0.07    | 13.81 ± 6.11      | 393.21 ± 194.37   |
|                    | Put 1   | 54.89 ± 53.49                       | 788.73 ± 92.72    | 34.42 ± 11.77   | 31.94 ± 27.96 | 36.66 ± 30.79     | 682.57 ± 76.3      | 9.41 ± 3.41     | 35.93 ± 29.48  | 41.3 ± 31.82      | 1262.51 ± 585.96  |
| Osmotic stress     | Non     | 34.62 ± 3.43                        | 635.69 ± 277.78   | 47.4 ± 28.56    | 17 ± 4.35     | 33.6 ± 28.2       | 606.42 ± 44.59     | 5.68 ± 1.14     | 2.37 ± 0.25    | 64.87 ± 17.67     | 2166.53 ± 447.94  |
|                    | DAP 0.1 | 44.46 ± 28.95                       | 668.05 ± 172.69   | 96.77 ± 33.46   | 18.68 ± 1.47  | 201.68 ± 83.62    | 646.78 ± 151.15    | 4.72 ± 0.75     | 2.17 ± 0.14    | 45.36 ± 12.28     | 1841.61 ± 314.4   |
|                    | DAP 1   | 41.9 ± 8.22                         | 1345.3 ± 150.18   | 246.96 ± 71.9   | 51.23 ± 16.14 | 41.23 ± 25.2      | 830.08 ± 528.08    | 6.68 ± 2.5      | 2.6 ± 0.54     | 38.91 ± 16.71     | 1903.13 ± 496.51  |
|                    | Orn 0.1 | 13.81 ± 1.73                        | 691.2 ± 282.06    | 79.3 ± 46.91    | 10.5 ± 2.27   | 53.7 ± 51.99      | 1014.01 ± 464.91   | 5.1 ± 0.6       | 2.07 ± 0.05    | 75.3 ± 61.65      | 2307.77 ± 482.05  |
|                    | Orn 1   | 13.7 ± 2.92                         | 338.08 ± 178.68   | 55.89 ± 12.82   | 7.65 ± 0.87   | 101.58 ± 42.42    | 369.48 ± 143.56    | 9.97 ± 7.59     | 2.05 ± 0.05    | 42.44 ± 24.63     | 979.95 ± 434.77   |
|                    | Put 0.1 | 8.32 ± 1.01                         | 201.8 ± 21.97     | 36.29 ± 27.92   | 3.25 ± 0.33   | 16 ± 4.05         | 339.28 ± 111.92    | 3.19 ± 0.67     | 1.04 ± 0.02    | 31.56 ± 5.93      | 950.77 ± 333.68   |
|                    | Put 1   | 18.27 ± 21.03                       | 586.93 ± 241.43   | 79.51 ± 10.7    | 13.88 ± 10.99 | 331.54 ± 236.44   | 1643.19 ± 499.32   | 15.78 ± 9.74    | 2.31 ± 0.28    | 239.76 ± 138.13   | 1629.39 ± 717.27  |
| Salt stress        | Non     | 22.75 ± 4.24                        | 2454.04 ± 478.51  | 57.2 ± 8.79     | 22.23 ± 4.29  | 35.46 ± 38.81     | 3623.59 ± 606.56   | 31.92 ± 8.5     | 5.79 ± 2       | 78.07 ± 19.25     | 2214.09 ± 751.84  |
|                    | DAP 0.1 | 42.34 ± 41.71                       | 3746.55 ± 968.3   | 51.84 ± 24.52   | 25 ± 9.01     | 17.01 ± 3.8       | 3894.49 ± 845.23   | 26.58 ± 8.54    | 4.46 ± 0.29    | 79.95 ± 13.38     | 1981.24 ± 544.36  |
|                    | DAP 1   | 19.82 ± 4.51                        | 4193.5 ± 712.07   | 403.98 ± 137.08 | 59.79 ± 13.01 | 25.07 ± 8.55      | 4155.99 ± 1786.67  | 59.56 ± 17.52   | 4.52 ± 0.99    | 99.17 ± 16.99     | 2050.85 ± 392.6   |
|                    | Orn 0.1 | 28.83 ± 18.62                       | 5304.56 ± 664.69  | 50.84 ± 13.78   | 31.24 ± 8.32  | 32.21 ± 14.97     | 7049.03 ± 1883.54  | 26.48 ± 8.24    | 6.78 ± 1.28    | 149.47 ± 37.22    | 2120.45 ± 333.79  |
|                    | Orn 1   | 15.03 ± 6.02                        | 2545.66 ± 775.17  | 35.86 ± 8.12    | 8.87 ± 0.97   | 30.09 ± 18.27     | 1928.84 ± 346.31   | 18.86 ± 9.68    | 3.37 ± 0.91    | 47.45 ± 25.41     | 994.74 ± 385.98   |
|                    | Put 0.1 | 7.52 ± 2.14                         | 4258.9 ± 1271.57  | 45.79 ± 17.8    | 7.32 ± 1.63   | 10.06 ± 6.78      | 4160.55 ± 1244.21  | 70.41 ± 68.98   | 5.02 ± 2.85    | 85.4 ± 27.89      | 1169.07 ± 312.59  |
|                    | Put 1   | 7.19 ± 7.74                         | 2098.91 ± 355.94  | 25.55 ± 4.16    | 8.19 ± 2.54   | 18.49 ± 7.05      | 3789.13 ± 894.65   | 16.52 ± 8.03    | 4.31 ± 3.26    | 77.86 ± 25.22     | 1284.77 ± 314.28  |
